# Supplementary material for: Identification of Proteases and Protease Inhibitors in Allergenic and Non-Allergenic Pollen
Source: MDPI journal article supplement (doi:10.3390/ijms18061199), 2017-06-05
Supplement: s1 [file s1]

## Supplementary figure

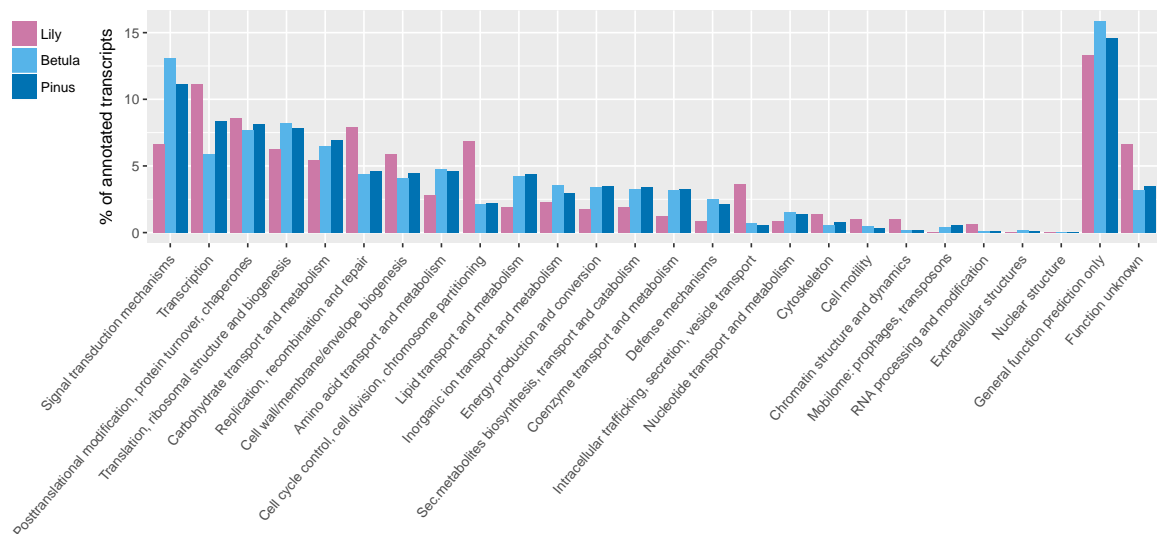

Figure S1: Assignment of *Betula verrucosa*, *Pinus sylvestris* and *Lilium longiflorum* transcripts to COG classes. Frequencies in percent of all assignments are given.

## Description of the columns in the supplementary data files

Columns are tab separated.

### COG classification (Supplementary File 2):

| Field         | Meaning                            |
|---------------|------------------------------------|
| Org           | Organism: Betula or Pinus          |
| COG code/name | COG functional class code and name |
| hits          | number of SwissProt matches        |

### GO classification (Supplementary File 3):

| Field     | Meaning                                                    |
|-----------|------------------------------------------------------------|
| Org       | Organism: Betula or Pinus                                  |
| GO domain | molecular function, cellular component, biological process |
| GO term   | GO level 1 term                                            |
| Hits      | number of SwissProt matches                                |

**Proteases and Inhibitors (Supplementary File 4):**

| Field       | Meaning                                       |
|-------------|-----------------------------------------------|
| Fun         | Function: P=Protease, I=Inhibitor             |
| Org         | Organism: Betula or Pinus                     |
| Pfam Acc    | Pfam accession                                |
| SP Acc      | SwissProt accession                           |
| n-hits      | number of transcripts matching to this SP Acc |
| sum(tpm)    | corresponding sum of TPM values               |
| sum(estcnt) | corresponding sum of estimated count values   |

**TMM values (Supplementary File 5):**

| Field    | Meaning                          |
|----------|----------------------------------|
| UniProt  | UniProt accession and ID         |
| TMM Bet  | TMM Values for Betula            |
| TMM Pin  | TMM Values for Pinus             |
| Prot/Inh | P=Protease, I=Inhibitor, PI=both |

**Allergen homologous transcripts (Supplementary File 6):**

| Field           | Meaning                                  |
|-----------------|------------------------------------------|
| Allergen        | Allergen name                            |
| SP_ACC          | SwissProt accession code of the allergen |
| Pfam            | Corresponding Pfam accession code        |
| PI              | P=Protease, I=Inhibitor, PI=both         |
| TPM_Bet/TPM_Pin | TPM value of the best Blast hit          |
